# Experimental erosion of microbial diversity decreases soil CH<sub>4</sub> consumption rates

Elvira Schnyder<sup>1</sup>, Paul L.E. Bodelier<sup>2</sup>, Martin Hartmann<sup>3</sup>,

Ruth Henneberger<sup>4</sup>, Pascal A. Niklaus<sup>1\*</sup>

- 1) Department of Evolutionary Biology and Environmental Studies, University of Zürich, Winterthurerstrasse 190, CH-8057 Zürich
  - 2) Department of Microbial Ecology, Netherlands Institute of Ecology (NIOO-KNAW), Droevendaalsesteeg 10, 6708PB Wageningen, the Netherlands. xxx
  - 3) Institute of Agricultural Sciences, Department of Environmental Systems Science, ETH Zürich, Universitätstrasse 2, 8092 Zürich, Switzerland
  - 4) Institute of Molecular Health Science, ETH Zürich, Otto-Stern-Weg 7, CH-8093 Zürich
- \* corresponding author

## Abstract

Biodiversity-ecosystem functioning (BEF) experiments have predominantly focused on communities of higher organisms, in particular plants, with comparably little known to date about the relevance of biodiversity for microbially-driven biogeochemical processes. Methanotrophic bacteria play a key role in Earth's methane (CH<sub>4</sub>) cycle by removing atmospheric CH<sub>4</sub> and reducing emissions from methanogenesis in wetlands and landfills. Here, we used a dilution-to-extinction approach to simulate diversity loss in a methanotrophic landfill cover soil community. Combining analyses of CH<sub>4</sub> flux and community structure, we found a linear decrease of CH<sub>4</sub> oxidation rates with the number of taxonomic units lost. This effect was independent of community size, consistent over the three-month study, and occurred in relatively diverse communities, challenging the notion of high functional redundancy mediating high resistance to diversity erosion in natural microbial systems. The effects we report resemble the ones for higher organisms, suggesting that BEF-relationships are universal across taxa and spatial scales.

## Introduction

Soil microbes modulate Earth's climate by mediating fluxes of major greenhouse gases including methane ( $\text{CH}_4$ ) [1].  $\text{CH}_4$  occurs at lower atmospheric volume mixing ratios than  $\text{CO}_2$  but exerts much larger radiative effects on a per-molecule basis so that the anthropogenic warming effect of  $\text{CH}_4$  is on par with that of  $\text{CO}_2$  on a decadal time scale [2]. Atmospheric  $\text{CH}_4$  loads also are of concern because they have shown an accelerated rise in recent years but the underlying drivers are not fully understood [3].

Soil microbes drive two key  $\text{CH}_4$  transformations: methanogenesis and  $\text{CH}_4$  oxidation. Methanogenic archaea produce  $\text{CH}_4$  under anaerobic conditions, a process that is quantitatively important in natural wetlands, rice paddies, and landfills [4]. Obligate aerobic methanotrophic bacteria oxidize  $\text{CH}_4$  in terrestrial soils, with less important contributions by other bacteria (e.g. ammonia oxidizing bacteria [5], and possibly also archaea under anaerobic conditions [6, 7]).  $\text{CH}_4$  oxidation by methanotrophs thus constitutes a biogenic sink that removes  $\text{CH}_4$  from the atmosphere. In wetlands and landfills, methanotrophs also remove  $\text{CH}_4$  produced by methanogenic archaea, and functionally thus act as a "biofilter" that eliminates a large fraction of potential soil  $\text{CH}_4$  emissions [8]. In these systems, changes in soil-atmosphere  $\text{CH}_4$  fluxes may therefore be mediated by changes in rates of  $\text{CH}_4$  oxidation, in rates of methanogenesis, or in both.

Over the past decades, experimental [9], observational [10], and theoretical studies [11] have demonstrated that biodiversity is critical for the provisioning of a wide range of ecosystem services. Most biodiversity experiments to date have focused on plant-related functions such as primary productivity. They generally

revealed effects that were “positive decelerating”, i.e. more diverse communities performed better but the additional benefit mediated by extra species diminished when communities already contained a high number of species. These positive biodiversity-ecosystem functioning (BEF) relationships have been attributed to three groups of mechanisms. First, diverse communities are more likely to contain highly productive species, a phenomenon also known as “selection probability effect” [12, 13]. Second, BEF relationships can arise from niche differentiation that allows more diverse communities to more fully acquire essential resources; there is little doubt that such complementarity is important, but to date remarkably little progress has been made in identifying the specific mechanisms and resources concerned [14–16]. Productivity can also be promoted by complementary biotic interactions which may reduce negative impacts of pathogens and consumers if these are host-specific and their activity density-dependent [17]. Third, species can modify the environmental conditions in a way that favors the growth of another species, a mechanism called facilitation [18].

Plants are major drivers of the global carbon cycle. They have evolved a fascinating diversity of organisms that are adapted to a wide range of environments. Nevertheless, they are metabolically relatively uniform and drive essentially the same suite of biogeochemical processes. In contrast, soil microbes drive a plethora of chemically extremely diversified ecosystem functions. The ecology and life-history of microbes differ from the ones of plants and animals, potentially giving rise to divergent mechanisms underpinning microbial BEF relationships [19]. The diversity of microorganisms in soils also is extreme, exceeding the one found in higher organisms by orders of magnitude

[20–23]. This supports the idea that microbial communities are less susceptible to diversity loss due to high functional redundancy. On the other hand, soils are extremely heterogeneous at the micro-scale, and some key microbial functions are carried out by phylogenetically relatively narrow groups of microbes. Aerobic CH<sub>4</sub> oxidation in soils, for example, is driven by bacteria that belong to either the Gammaproteobacteria (type I methanotrophs), Alphaproteobacteria (type II methanotrophs), or Verrucomicrobia (type III methanotrophs) [24, 25]. In typical habitats, their diversity rarely exceeds a few dozen strains. It may thus well be that CH<sub>4</sub> oxidation rates by these communities critically depend on the number of species present. However, experimental microbial BEF research has only recently begun to emerge [26–32] and little is understood to date on how microbe-mediated ecosystem functions depend on the diversity of the respective guilds.

Here, we analyze diversity effects on CH<sub>4</sub> consumption in microbial communities extracted from the cover soil of a landfill that had accumulated several million m<sup>3</sup> of municipal solid waste until the 1990s. In such cover soils, methanotrophs oxidize CH<sub>4</sub> at high rates, thereby filtering most CH<sub>4</sub> produced in the course of waste degradation [33, 34]. Nevertheless, landfills remain a major global anthropogenic source of CH<sub>4</sub>, and any temporary or permanent reduction in methanotrophic activity in cover soils can trigger massive increases in net CH<sub>4</sub> emissions. To test whether methanotrophic activity in such communities is impaired by diversity loss, we created communities that spanned a gradient in the diversity of taxonomic units using a dilution-to-extinction approach. Diversity erosion by dilution allowed us to manipulate the diversity of communities with microbial members that are difficult to isolate and cultivate. It further had the

advantage that the resulting diversity gradients mimicked a realistic extinction scenario where rare species were more likely to go extinct [35]. The dilutions ranged from  $10^{-1}$  over  $10^{-3}$ ,  $10^{-4}$ ,  $10^{-5}$  to  $10^{-7}$ , and were replicated in three independent extinction series. We inoculated microcosms with these dilutions, pre-incubated the microcosms to equalize community sizes, and then incubated these under headspace average  $\text{CH}_4$  concentrations of  $7400 \mu\text{mol mol}^{-1}$  for nearly three months, at a temperature that was either constant at  $15^\circ\text{C}$  or which oscillated diurnally between 10 and  $20^\circ\text{C}$ . Each treatment combination was replicated 4 times, resulting in a total of 120 microcosms (3 series  $\times$  5 dilutions  $\times$  2 temperatures  $\times$  4 replicates). Throughout the experiment, we quantified methanotrophic activity by assessing  $\text{CH}_4$  consumption and  $\text{CO}_2$  production, with the latter also including respiration by non-methanotrophs. Using quantitative PCR (qPCR), we determined methanotrophic community sizes and growth as abundance of a key functional gene, *pmoA*, which encodes for a subunit of the particulate methane mono-oxygenase enzyme found in most methanotrophs. Total bacterial abundance was determined by ribosomal gene abundance (16S rRNA subunit). Finally, we determined the composition of the experimental communities by high-throughput amplicon sequencing of ribosomal (16S rRNA) and functional (*pmoA*) gene fragments.

Our aim was to test whether diversity loss affects methanotroph community functioning. We further were interested whether phylogenetic diversity is a good predictor of ecosystem functioning. Ultimately, BEF relationships arise from differences in functional traits among species, and phylogenetic diversity might serve as a proxy for functional differences if the relevant traits are preserved through evolutionary time [36]. Finally, we asked whether diversity effects were

larger in a fluctuating environment (diurnal temperature cycle) that might provide a larger environmental niche space and allow for functional complementarity among community members.

## Results

**Community diversity.** We extracted DNA from microcosms after 0, 31, 58 and 86 days (end of the experiment) and sequenced the 16S rRNA gene (V1—V2) and the *pmoA* gene using the Illumina MiSeq platform. The  $11 \cdot 10^6$  16S rRNA gene and  $14 \cdot 10^6$  *pmoA* sequences clustered into 2697 non-methanotrophic bacterial and 58 methanotrophic OTUs (Methods). Using OTU abundances, we determined the diversity metrics richness (S), Shannon index (H), and phylogenetic diversity (PD), which were statistically highly significantly related to dilution level (Fig. 1;  $F_{1,10}=55\text{—}274$  and  $P=2 \cdot 10^{-5}\text{—}10^{-8}$ , depending on gene and diversity metric). Importantly, the established diversity gradient was maintained throughout the entire incubation, with similarly significant effects after 86 days. The realized diversity gradient was statistically independent of the temperature treatment.

**Community composition.** At the end of the experiment, the most common non-methanotrophic bacterial taxa were Proteobacteria, Bacteroidetes, Actinobacteria and Verrucomicrobia. Type Ia methanotrophs, in particular *Methylobacter*, dominated the methanotroph community (Fig. 2). Across all dilutions, the proportion of type Ia methanotrophs decreased with time, with opposite effects on type IIa methanotrophs (Fig. 2). Permutational MANOVA (Methods) with Benjamini-Hochberg adjustment to a false discovery rate of 5% did not reveal any effects of dilution on non-methanotrophic bacterial community composition, at all taxonomic levels investigated (phylum, class, order, family, genus, OTU). Conversely, low to intermediate dilution levels were characterized by high type Ia methanotrophs abundances, in particular of *Methylobacter* and *Methylosarcina*.



At high dilution, the methanotroph community was almost exclusively composed of type IIa methanotrophs of the genera *Methylocystis* and *Methylosinus* (Fig. 2). The temperature treatments did not significantly affect the relative abundance of any taxa, neither for *pmoA* nor for 16S rRNA gene sequences. Principle coordinate analysis (PCoA) of Bray-Curtis dissimilarities among communities revealed that composition changed relatively little with time but that the serial dilutions resulted in a consistent trajectory in ordination space, independent of the applied temperature treatment (SI Fig. 1).

**Community size.** Quantitative PCR (qPCR) analysis revealed that 16S rRNA gene copy numbers decreased in the course of the experiment but were statistically independent of dilution and temperature treatments (Fig. 3b, d). Averaged over the experiment, *pmoA* copy numbers also were statistically independent of dilution (Fig. 3a). However, at the beginning of the experiment (day 0), *pmoA* copy numbers were approximately two orders of magnitude lower in the highest dilution ( $10^{-7}$ ) compared to less diluted samples (Fig. 3c). This effect had disappeared at the second sampling on day 31. qPCR data for *pmoA* were very variable, with equivocal findings depending on whether data were inspected on a *log*-scale (which accounts for the exponential nature of the PCR process) or on an untransformed scale (which is a necessity to test for biodiversity effects, see Methods). The *log*-transformed data indicated a trend for communities in the high dilution treatments to grow through time, whereas the least diluted communities tended to decrease in size.

**CH<sub>4</sub> consumption and CO<sub>2</sub> release rates.** CH<sub>4</sub> consumption, determined by gas chromatography of headspace samples, decreased 1.9-fold with diversity loss along the dilution gradient ( $P < 0.001$ , Fig. 4, averages over all samplings). Net

CH<sub>4</sub> consumption was significantly related to *pmoA*-based methanotrophic OTU richness, the Shannon diversity index H, and phylogenetic diversity PD (Fig. 4). CH<sub>4</sub> consumption rates were higher initially and stabilized during the first 20 days, except for the highest dilution (10<sup>-7</sup>) which showed no initial activity and then overshoot before also stabilizing around day 30 (Fig. 5). Towards the end of the experiment (days 60—86), diversity effects even grew larger, resulting in a 7.5-fold change from the 10<sup>-1</sup> to the 10<sup>-7</sup> dilution, with rates of 105±9 and 14±3 μmol CH<sub>4</sub> d<sup>-1</sup> microcosm<sup>-1</sup>, respectively. CO<sub>2</sub> production very closely mirrored CH<sub>4</sub> consumption (r = 0.86, Pearson's product moment correlation, P < 0.001; data not shown). The temperature treatment did not affect net CH<sub>4</sub> consumption.

## Discussion

Using a dilution-to-extinction approach, we demonstrate that diversity loss can affect net methane (CH<sub>4</sub>) consumption by methanotrophic communities extracted from a landfill cover soil. Methanotrophic bacteria perform critical biogeochemical functions in many ecosystems; in landfills, including the one we studied here, methanotrophs typically capture nearly all CH<sub>4</sub> produced during the decomposition of waste material [34]. Landfills are an important anthropogenic source of CH<sub>4</sub>. Establishing and managing cover soils so that they efficiently filter CH<sub>4</sub> is a key tool to mitigate landfill CH<sub>4</sub> emission. Our experiments suggest that this methanotroph-driven ecosystem service critically depends on the presence of a sufficiently diverse methanotrophic community.

Experimental research has shown that typical BEF relationships in communities of higher organisms such as plants generally are positively decelerating, i.e. the benefit of additional species decreases with the diversity of the system. These relationships may even saturate because of functional redundancy since the loss of a few species will functionally be compensated by others with no resulting net effect on community-level function [37]. It has been argued that microbial communities are likely to exhibit pronounced functional redundancy [38] due to their tremendous diversity and due to the relative simplicity of microbes compared to plants [21–23]. If this was true, microbial diversity loss would only lead to a loss of function at the lower end of the diversity gradient [39]. These considerations are highly relevant for methanotrophic communities, for several reasons. First, methanotrophs all perform the same specialized metabolic function that is restricted to comparably narrow

phylogenetic groups. Second, methanotroph diversity typically is relatively low with rarely more than a few dozen OTUs. Third, methanotroph diversity and activity are vulnerable to disturbance, for example by high mineral N levels as they can result from fertilizer application [40]. A total of 58 methanotrophic OTUs were detected in the landfill cover soil under investigation. Although this number might appear high, we observed a clear reduction of CH<sub>4</sub> consumption rates under dilution-induced diversity loss, contrasting the notion that functional redundancy protects ecosystem functioning from diversity loss. Importantly, these detrimental effects manifested despite the fact that the OTUs eliminated by dilution were of low abundance. This finding corroborates earlier studies that used isotope probing of methanotrophic communities and found that subordinate taxa contributed significantly to community-level functioning [41].

Serial dilutions that are used to inoculate sterile soil microcosms are the method of choice to reduce diversity in microbial BEF studies where the number of species is high and their identity unknown [42, 43], and allows to the preferential extinction of rare taxa [35]. In our study, the applied serial dilutions were highly correlated with OTU-based diversity metrics for methanotrophic and non-methanotrophic bacterial communities, but the 10<sup>-1</sup> dilution deviated from the overall pattern. In this dilution (but not in others), a milky residue and gel-like pellets occurred during DNA extraction and likely reduced DNA yields and led to a relative underestimation of diversity. The primary treatment applied, dilution level, was unaffected by this artifact and explained the observed responses better than the OTU-based metrics unless the least-diluted treatment was excluded. Irrespective of this methodological caveat, the relationship between diversity and

methanotrophic activity was robust, resembling patterns of BEF-relationship found in plant communities [44].

In contrast to diversity experiments in which artificial communities are assembled *de novo* from isolated strains [45], dilution treatments decrease the abundance of both target and non-target microorganisms, and our study was no exception. However, soil communities recovered well during the 4-week pre-incubation, with no remaining differences in total bacterial and only relatively small differences in methanotrophic community size at day zero except for the most diluted community which required more time to recover. Non-methanotrophic bacterial community size decreased over the course of the experiment, but this change was independent of dilution. Methanotroph community size showed a dilution-dependent temporal dynamics, with more diluted samples displaying higher initial growth rates. This likely was the case because methanotrophic abundances were below the carrying capacity of the system, possibly combined with reduced competition for oxygen and nutrients by heterotrophs. As a result, methanotrophs initially grew exponentially and community size overshot in microcosms of the highest dilution treatment. A similar effect has been observed in other studies, including sewage microbial communities [46] and grassland denitrifier communities [47], in which the highest dilutions showed the strongest initial growth in bacterial abundance. However, in our study, this effect was transient, with trends in community size that reversed towards the end of the study. Despite the temporal dynamics in community size, effects of dilution and OTU diversity on CH<sub>4</sub> consumption remained remarkably stable, indicating that the BEF-effects found were unrelated to the initial fluctuations in community size.

Towards the end of the experiment, net CH<sub>4</sub> consumption increased and biodiversity effects became most pronounced. Many studies with plant systems have shown that BEF relationships grow larger through time [48–52]. The methanotrophs in our study thrived on above-atmospheric CH<sub>4</sub> concentrations, displayed an apparent low-affinity kinetic [53], and had a relatively short generation time compared to plants; our three-month experiment under near-optimal growth conditions will thus have allowed for many generations. BEF-effects that grew through time also have been observed in microbial systems [54, 55], although patterns generally varied among environments. We did not investigate the specific mechanisms that promoted biodiversity effects; however, there is evidence that stronger BEF relationships emerge from the evolution of less negative species interactions [54] or from an increase in interspecific niche complementarity (microbes: [56]; plants: [57]).

Methanotroph diversity may buffer ecosystem functioning during environmental fluctuations [58–60]. Methanotrophs isolated from environmental samples typically exhibit distinct temperature optima. We therefore expected stronger BEF relationships in the model communities that were exposed to a diurnal temperature cycle because we reasoned that more diverse communities would span a wider range of temperature optima. However, we did not find such an effect. One reason may be that we assessed CH<sub>4</sub> consumption outside the incubator, under constant temperature, regardless of the original treatment. We nevertheless would have expected that effects present in the incubator would have persisted for some time and therefore would have been detectable in the measurements. Interestingly, we also did not observe any effect of temperature regime on the diversity of methanotrophs, their specific community composition,

or their growth. This implies that these communities remained unaffected by temperature cycling, possibly because the temperature variability resembled the fluctuations found naturally in the original landfill soil and species or entire communities were adapted to these conditions.

The food web in our microcosm communities was largely CH<sub>4</sub>-based, with no plants present in the microcosms and plant cover was relatively low at the original landfill sampling site. However, our dilution-to-extinction approach not only reduced the diversity of methanotrophs but also the one of non-methanotrophic bacteria (and potentially also of other groups of organisms that we did not measure, for example protists). In natural systems, the diversity of even remote taxa often co-varies [10, 61], so that BEF relationships observed in such systems reflect the compound effects of diversity changes across multiple, potentially interacting, taxonomic groups. Methanotrophs require other microorganisms for sustained growth [60, 62], most likely to remove metabolites that otherwise accumulate to inhibitory levels. Recent experiments also have shown that volatiles produced by heterotrophs, specifically dimethyl sulfides, can promote methanotrophic growth even if heterotrophs are physically isolated [63]. While we think that the reduced methanotrophic activity resulted primarily from a loss of methanotrophic strains, these findings raise the possibility that a loss of interactions with heterotrophic bacteria further exacerbated the reduced functioning in low-diversity communities.

Methanotrophs play a key role in the regulation of climate by oxidizing large fractions of the CH<sub>4</sub> produced in anaerobic environments, thereby preventing CH<sub>4</sub> emissions. Methanotrophs also oxidize significant amounts of atmospheric CH<sub>4</sub> [2]. Our results indicate that a reduction in the diversity of methanotrophs can

affect system-level CH<sub>4</sub> consumption, through mechanisms independent of community size. The past years have seen an accelerated rise in atmospheric CH<sub>4</sub> loads [3], which underlines the critical importance of diverse methanotrophic communities in sustaining stable CH<sub>4</sub> oxidation services in managed and natural wetlands. More generally, our study suggests that microbial diversity supports microbially-driven ecosystem functions in a way similar to the one found in plants, i.e. positive BEF-relationships appear universal across very different taxa and spatial scales.

## **Acknowledgements**

This project was funded by the Swiss National Science Foundation (grant 144065 to PAN) and the University of Zurich. We thank René Husi, Thomas Rime, and Mariela Soto Araya for help with laboratory analysis. We acknowledge the contribution of the staff at the McGill University and Génome Québec Innovation Center, Montreal, Canada, for the sequencing service. We further are indebted to Kentaro Shimizu and the Genetic Diversity Centre (GDC), ETH Zurich for generous help with laboratory facilities. PAN acknowledges support from the University of Zurich Research Priority Programme Global Change and Biodiversity.



## Methods

**Soil sampling.** We collected soil from a landfill (Liestal, Basel-Land, Switzerland, 570 m a.s.l. 47°29'N, 7°45'E, [64]) that had accumulated c.  $3 \cdot 10^6$  m<sup>3</sup> of household, office and construction waste before it was covered with 2 m of soil in the 1990s. The cover soil is a heterogeneous mixture, loamy in texture (40–60% silt), slightly alkaline (pH 7.3–7.9), and contains pebbles, rocks, boulders and construction material. The annual temperature at the site averages around 9°C and annual precipitation around 1000 mm. Active methanotroph communities are dominated by type Ia methanotrophs [65]. We collected soil from a depth of 30–50 cm (ca. 150 cm west of sampling location C1 described in [33]), sieved the samples (2 mm mesh) and stored them at 4°C. Before the start of the experiment, the soil was incubated for two weeks at room temperature under an atmosphere of air spiked with 1% CH<sub>4</sub> (v/v) to re-activate the methanotrophs.

**Experimental setup.** Inocula were prepared by homogenizing 10 g of the collected landfill soil in 20 mL of sterile H<sub>2</sub>O with a pestle and a mortar. This slurry was then repeatedly diluted 10-fold by mixing 1 mL of the highest dilution with 9 mL of sterile H<sub>2</sub>O until a final dilution of 10<sup>-10</sup> was obtained. This procedure was repeated three times with three separate original soil subsamples, resulting in three independent dilution series. From each dilution, 9 mL were transferred to an Erlenmeyer flask with 1 mL NMS [66] and 40 g  $\gamma$ -sterilized soil (collected at Nenzlingen, Switzerland; 47°33'N, 7°34'E, 520 m a.s.l.; silty clay loam soil, 41% clay, 52% silt 3.9% C, 0.33% N, pH  $\approx$  7,8; [67]). This matrix soil has very low natural methanotroph abundances, which minimizes interference from remaining soil DNA (the relative abundance of the *pmoA* gene measured by qPCR in this

soil was less than 0.01% of that measured later in inoculated microcosms). The flasks were closed with gas-permeable cotton stoppers and incubated in air-tight jars for one month to allow methanotrophic communities to recover. Headspace CH<sub>4</sub> concentrations were brought to 1% by injecting CH<sub>4</sub> with a syringe. The flasks were ventilated regularly. Headspace CH<sub>4</sub> was monitored by gas chromatography and additional CH<sub>4</sub> was injected when needed. For the experiment, we used a total of five dilutions: four that showed a recovery of methanotrophic activity during the pre-incubation (dilutions 10<sup>-1</sup>, 10<sup>-3</sup>, 10<sup>-4</sup>, 10<sup>-5</sup>) plus one that did not show any significant methanotrophic activity at the beginning of the study (dilution 10<sup>-7</sup>) but that recovered later. The experimental microcosms were created by transferring 2 g of cultured soil with an additional 2 g of sterile soil matrix to 50 mL centrifugation tubes (Sarstedt, Nümbrecht, Germany).

**Experimental conditions.** We incubated each of the 15 distinct communities together with negative controls (sterile soil only) in separate incubators with temperature averages of 15°C (3 dilution series × 5 dilutions × 7 replicates + 2 controls = 107 microcosms per incubator). In the first incubator, the temperature was kept constant. In the second, the temperature ramped up from 10 to 20°C in 12h, and then down again to 10°C in another 12h. Within the incubators, the microcosms were kept in air-tight chambers that were connected to a custom-built system that measured and controlled CH<sub>4</sub> concentrations. Headspace air was pumped through a heat exchanger that equilibrated the gas to room temperature. Then, the sampled air was dried in a tube filled with silica gel beads before CH<sub>4</sub> concentrations were determined in a CH<sub>4</sub> detector cell (TGS 2611, Figaro Inc., Arlington Heights, IL). Whenever CH<sub>4</sub> concentrations fell below

approximately 6000 ppm, a mixture of 5% CH<sub>4</sub> and 10% O<sub>2</sub> in N<sub>2</sub> was added through a solenoid valve. The readings obtained from the semiconductor gas sensor were not of very high precision. We therefore used the same sensor and electronics to control CH<sub>4</sub> concentrations in both incubators (switched between incubators with a solenoid valve). The concentration therefore did not differ systematically between the treatments. CH<sub>4</sub> concentrations were further monitored by taking headspace samples from the boxes with a syringe 1–2 times a day. CH<sub>4</sub> concentrations averaged 7400 μmol CH<sub>4</sub> mol<sup>-1</sup> throughout the experiment (gas chromatographic analysis).

**CH<sub>4</sub> consumption and CO<sub>2</sub> release rates.** To determine net CH<sub>4</sub> and CO<sub>2</sub> exchange rates, replicate microcosms of all 30 communities were removed from the incubators and placed in air-tight 3 L jars with elevated CH<sub>4</sub> concentrations. Headspace samples were collected with a syringe and analyzed for CH<sub>4</sub> and CO<sub>2</sub> by gas chromatography (Agilent 7890N gas chromatograph; CH<sub>4</sub> was detected with a flame ionization detector; 12' Porapak Q column; isothermic at 80°C; He carrier gas; CO<sub>2</sub> was determined on the same detector after reducing CO<sub>2</sub> with H<sub>2</sub> on a Ni-catalyst; Agilent Technologies Inc., Santa Clara, CA). A total of 3 headspace samples were collected over 3 days, except when CH<sub>4</sub> consumption rates were low, in which case 3–4 samples were taken over 4 days. Then, microcosms were placed back in the incubators. Gas exchange rates were calculated by linear regression of headspace concentrations against sampling time, with consumption rates converted to μmol microcosm<sup>-1</sup> d<sup>-1</sup> by applying the ideal gas law.

**DNA extraction.** After 0, 31, 58, and 86 days of incubation, one of the replicates of each of the 15 dilution × dilution series combinations was removed from both

incubators and DNA retrieved using the xanthogenate-based extraction described in [45]. Extracted DNA was purified twice using the PowerClean Pro DNA Clean-Up Kit (MoBio, Carlsbad, CA) to remove PCR inhibitors.

**Quantitative PCR.** We quantified the size of total bacterial communities and methanotrophic communities by determining the abundances of the 16S rRNA gene (primer 27F and 1406R) and of the methanotrophic *pmoA* gene (subunit A of the particulate methane mono-oxygenase gene; primers A189F and mb661) by quantitative PCR (StepOne real-time PCR system, Applied Biosystems, Foster City, CA; SI Tables S1, S2). For calibration, a serial dilution of purified DNA from *Methylococcus capsulatus* Bath (quantified with a Qubit Fluorometer, Invitrogen, Carlsbad, CA) was included in duplicate in each run. Additionally, we included reference samples with DNA of *M. capsulatus* on all plates and then standardized between plates using the geometric mean [68].

**Sequencing.** The composition of total bacterial and methanotrophic communities was determined by amplifying in duplicate the variable regions V1 and V2 of the 16S rRNA gene and the *pmoA* gene (primer pairs 27F/341R and A189F/mb661, respectively; SI Tables S1 and S2). The duplicate PCR products were pooled and purified with the GeneJET PCR purification kit (Thermo Scientific, Waltham, MA) and quantified fluorometrically using the Qubit dsDNA BR Assay Kit (ThermoFischer, Waltham, MA) on the Spark 10M Multimode Microplate Reader (Tecan, Männedorf ZH, Switzerland) with a standard curve (0–100 ng DNA  $\mu\text{L}^{-1}$ ). Samples were barcoded with the Fluidigm Access Array technology and the amplified regions were paired-end sequenced on the Illumina MiSeq v3 platform at the Genome Quebec Innovation Center, Montreal, Canada. Forward and reverse sequence data were merged, quality controlled and clustered by OTU

using a customized pipeline [45] that based on the algorithms implemented in USEARCH v9 [69]. All *pmoA* OTU sequences were blasted against the NCBI database and sequences that did not yield a match or were not *pmoA* were removed. For taxonomic classification, the OTU centroid sequences were mapped using the naïve Bayesian classifier implemented in MOTHUR [70] with a minimum bootstrap support of 60%. 16S<sub>V1-V2</sub> and *pmoA* sequences were mapped against sequences from the SILVA database [71], version 123, retrieved from <https://www.arb-silva.de>, and the *pmoA* taxonomic classifier [72], respectively.

**Alpha diversity and phylogenetic diversity.** Phylogenetic trees (UPGMA) for the 16S rRNA gene and the *pmoA* gene were calculated with Clustal Omega [73] using the web services from the EMBL-EBI [74]. *pmoA* phylogenies were built by adding sequences retrieved from GeneBank for all accessions in the *pmoA* phylogeny in Fig. 1 in [75]. The phylogenetic diversity (PD) of each sample was calculated as the total branch length of the phylogenetic subtree defined by the strains found in each sample (function calcPD; <https://github.com/pascal-niklaus/pdiv>). We randomly subsampled both 16S and *pmoA*-based OTU tables 5000 times to an even depth (10000 sequences 16S rRNA, 18000 sequences *pmoA*) and determined OTU richness (S), the Shannon index of OTU distribution (H), and phylogenetic diversity (PD) of these rarefied OTU sets. Rarefaction reduced S on average by 7% and 25% for *pmoA* and 16S, respectively. H was nearly invariant to rarefaction, with reductions < 1%. Reductions in PD averaged 4% and 22% for *pmoA* and 16S, respectively. A few samples had too few sequences for rarefaction; this was the case in particular for *pmoA* in the 10<sup>-7</sup> dilution at day 0. These samples are marked in figures and were excluded from statistical analyses.

**Statistical analysis.** We used analysis of variance (ANOVA) based on general linear models (R 3.5; <http://r-project.org>) and mixed models (ASReml 3.0; VSN International, Hemel Hempstead, UK) to test for effects of our experimental treatments on methanotrophic activity and community size. Fixed effects were the experimental treatments dilution (*log*-transformed), temperature (two-level factor), and their interactions. Community composition (the 15 specific combinations of dilution series and dilution) was included as random effect. Since the goal of the dilution treatment was to reduce the diversity of methanotrophs, we fitted additional models with OTU diversity as explanatory variables. For biodiversity effects, the null hypothesis is that contributions of OTUs to functioning are additive, i.e. that OTUs do not interact in a systematically positive (or, as rarely found, negative [76]) way. Testing for diversity effects by regression thus requires that data remain untransformed. This precludes any data transformation to address heteroscedastic residuals because this could introduce spurious false positives (see [77] for details). In our analyses, residuals generally were normally distributed and homogenous except for the  $10^{-7}$  dilution which sometimes showed enhanced variation; we accounted for this heteroscedasticity by fitting a heterogeneous random term ('idh' option of ASReml with a separate, larger, variance component for dilution  $10^{-7}$ ). For the analysis of qPCR data, we adjusted for heteroscedasticity by weighing data with the inverse of the within-dilution level variance. Effects of temperature and dilution treatments on community composition were tested using permutational ANOVA [78] as implemented in the 'adonis' function of R-library 'vegan'. To test for effects of the temperature treatment, data were permuted among temperature treatments within combinations of dilution level and series. To tests for effects of dilution, dilution

levels were permuted within dilution series, keeping pairs of microcosms with different temperature treatment as unaltered unit of randomization. These tests were performed at different levels of taxonomic resolutions, from OTUs to genera to families to classes to subphyla to phyla, and test results adjusted to a false discovery rate of 5% using the method of Benjamini and Hochberg [79] as implemented in the R function 'p.adjust'. We determined Bray-Curtis dissimilarities among communities based on square root-transformed abundance data and used principal coordinate analysis (PCoA) to map these differences ( $\beta$  diversity) into two-dimensional space using the R function 'cmdscale'. These ordination plots were used to inspect the trajectories that dilution and time-series delineated in composition space, and whether these trajectories depended on the applied temperature treatment.

## References

1. Singh BK, Bardgett RD, Smith P, Reay DS. Microorganisms and climate change: terrestrial feedbacks and mitigation options. *Nat Rev Microbiol* 2010; **8**: 779–790.
2. IPCC. Climate Change 2013: The physical science basis. Contribution of working group I to the fifth assessment report of the intergovernmental panel on climate change. 2013. Cambridge University Press, Cambridge, United Kingdom and New York, NY, USA.
3. Mikaloff Fletcher SE, Schaefer H. Rising methane: a new climate challenge. *Science (80- )* 2019; **364**: 932–933.
4. Bridgham SD, Cadillo-Quiroz H, Keller JK, Zhuang Q. Methane emissions from wetlands: Biogeochemical, microbial, and modeling perspectives from local to global scales. *Glob Chang Biol* 2013; **19**: 1325–1346.
5. Hanson RS, Hanson TE. Methanotrophic bacteria. *Microbiol Rev* 1996; **60**: 439–471.
6. Cui M, Ma A, Qi H, Zhuang X, Zhuang G. Anaerobic oxidation of methane: An ‘active’ microbial process. 2015. Wiley-Blackwell. , **4**: 1–11
7. Knittel K, Boetius A. Anaerobic oxidation of methane: Progress with an unknown process. *Annu Rev Microbiol* 2009; **63**: 311–334.
8. Conrad R. The global methane cycle: Recent advances in understanding the microbial processes involved. *Environ Microbiol Rep* 2009; **1**: 285–292.
9. Cardinale BJ, Matulich KL, Hooper DU, Byrnes JE, Duffy E, Gamfeldt L, et al. The functional role of producer diversity in ecosystems. *Am J Bot* 2011;



**98:** 572–592.

10. Oehri J, Schmid B, Schaepman-Strub G, Niklaus PA. Biodiversity promotes primary productivity and growing season lengthening at the landscape scale. *Proc Natl Acad Sci U S A* 2017; **114**: 10160–10165.
11. Loreau M, de Mazancourt C. Biodiversity and ecosystem stability: A synthesis of underlying mechanisms. *Ecol Lett* 2013; **16 Suppl 1**: 106–115.
12. Aarssen LW. High productivity in grassland ecosystems: Effected by species diversity or productive species? *Oikos* 1997; **80**: 183–184.
13. Loreau M. Separating sampling and other effects in biodiversity experiments. *Oikos* 1998; **82**: 600–602.
14. Williams LJ, Paquette A, Cavender-Bares J, Messier C, Reich PB. Spatial complementarity in tree crowns explains overyielding in species mixtures. *Nat Ecol Evol* 2017; **1**: 0063.
15. von Felten S, Niklaus PA, Scherer-Lorenzen M, Hector A, Buchmann N. Do grassland plant communities profit from N partitioning by soil depth? *Ecology* 2012; **93**: 2386–2396.
16. Silvertown J, Dodd ME, Gowing DJG, Mountford JO. Hydrologically defined niches reveal a basis for species richness in plant communities. *Nature* 1999; **400**: 61–63.
17. Maron JL, Marler M, Klironomos JN, Cleveland CC. Soil fungal pathogens and the relationship between plant diversity and productivity. *Ecol Lett* 2011; **14**: 36–41.
18. Bruno JF, Stachowicz JJ, Bertness MD. Inclusion of facilitation into

- ecological theory. *Trends Ecol Evol* 2003; **18**: 119–125.
19. Krause S, Le Roux X, Niklaus PA, Van Bodegom PM, Lennon JT, Bertilsson S, et al. Trait-based approaches for understanding microbial biodiversity and ecosystem functioning. *Front Microbiol* 2014; **5**: 251.
  20. Locey KJ, Lennon JT. Scaling laws predict global microbial diversity. *PNAS* 2016; **113**: 5970–5975.
  21. Roesch LFW, Fulthorpe RR, Riva A, Casella G, Hadwin AKM, Kent AD, et al. Pyrosequencing enumerates and contrasts soil microbial diversity. *ISME J* 2007; **1**: 283.
  22. Sogin ML, Morrison HG, Huber JA, Mark Welch D, Huse SM, Neal PR, et al. Microbial diversity in the deep sea and the underexplored ‘rare biosphere’. *PNAS* 2006; **103**: 12115–12120.
  23. Torsvik V, Goksoyr J, Daae FL. High diversity in DNA of soil bacteria. *Appl Environ Microbiol* 1990; **56**: 782–787.
  24. Knief C. Diversity and habitat preferences of cultivated and uncultivated aerobic methanotrophic bacteria evaluated based on *pmoA* as molecular marker. *Front Microbiol* 2015; **6**: 1346.
  25. McDonald IR, Bodrossy L, Chen Y, Murrell JC. Molecular ecology techniques for the study of aerobic methanotrophs. *Appl Environ Microbiol* 2008; **74**: 1305–1315.
  26. Bell T, Newman JA, Silverman BW, Turner SL, Lilley AK. The contribution of species richness and composition to bacterial services. *Nature* 2005; **436**: 1157–1160.

27. Bier RL, Bernhardt ES, Boot CM, Graham EB, Hall EK, Lennon JT, et al. Linking microbial community structure and microbial processes: An empirical and conceptual overview. *Fems Microbiol Ecol* 2015; **91**: fiv113–fiv113.
28. Delgado-Baquerizo M, Maestre FT, Reich PB, Jeffries TC, Gaitan JJ, Encinar D, et al. Microbial diversity drives multifunctionality in terrestrial ecosystems. *Nat Commun* 2016; **7**: 10541.
29. Fetzer I, Johst K, Schäwe R, Banitz T, Harms H, Chatzinotas A. The extent of functional redundancy changes as species' roles shift in different environments. *PNAS* 2015; **112**: 14888–14893.
30. Replansky T, Bell G. The relationship between environmental complexity, species diversity and productivity in a natural reconstructed yeast community. *Oikos* 2009; **118**: 233–239.
31. Wertz S, Degrange V, Prosser JI, Poly F, Commeaux C, Guillaumaud N, et al. Decline of soil microbial diversity does not influence the resistance and resilience of key soil microbial functional groups following a model disturbance. *Environ Microbiol* 2007; **9**: 2211–2219.
32. Wertz S, Degrange V, Prosser JI, Poly F, Commeaux C, Freitag T, et al. Maintenance of soil functioning following erosion of microbial diversity. *Environ Microbiol* 2006; **8**: 2162–2169.
33. Henneberger R, Lüke C, Mosberger L, Schroth MH. Structure and function of methanotrophic communities in a landfill-cover soil. *Fems Microbiol Ecol* 2012; **81**: 52–65.
34. Schroth MH, Eugster W, Gómez KE, Gonzalez-Gil G, Niklaus PA, Oester

- P. Above- and below-ground methane fluxes and methanotrophic activity in a landfill-cover soil. *Waste Manag* 2012; **32**: 879–889.
35. Giller PS, Hillebrand H, Berninger UG, Gessner MO, Hawkins S, Inchausti P, et al. Biodiversity effects on ecosystem functioning: Emerging issues and their experimental test in aquatic environments. *Oikos* 2004; **104**: 423–436.
36. Cadotte MW, Cardinale BJ, Oakley TH. Evolutionary history and the effect of biodiversity on plant productivity. *PNAS* 2008; **105**: 17012–17017.
37. Salles JF, Le Roux X, Poly F. Relating phylogenetic and functional diversity among denitrifiers and quantifying their capacity to predict community functioning. *Front Microbiol* 2012; **3**: 1–15.
38. Nannipieri P, Ascher J, Ceccherini MT, Landi L, Pietramellar G, Renell G. Microbial diversity and soil functions. *Eur J Soil Sci* 2003; **54**: 655–670.
39. Nielsen UN, Ayres E, Wall DH, Bardgett RD. Soil biodiversity and carbon cycling: A review and synthesis of studies examining diversity-function relationships. 2011. Blackwell Publishing Ltd. , **62**: 105–116
40. Bodelier PLE, Laanbroek HJ. Nitrogen as a regulatory factor of methane oxidation in soils and sediments. *FEMS Microbiol Ecol* 2004; **47**: 265–277.
41. Bodelier PLE, Meima-Franke M, Hordijk CA, Steenbergh AK, Hefting MM, Bodrossy L, et al. Microbial minorities modulate methane consumption through niche partitioning. *ISME J* 2013; **7**: 2214–2228.
42. Garland JL, Lehman RM. Dilution/extinction of community phenotypic characters to estimate relative structural diversity in mixed communities. *Fems Microbiol Ecol* 1999; **30**: 333–343.

43. Yan Y, Kuramae EE, Klinkhamer PGL, van Veen JA. Revisiting the dilution procedure used to manipulate microbial biodiversity in terrestrial systems. *Appl Environ Microbiol* 2014; **81**: 1–22.
44. Cardinale BJ, Duffy JE, Gonzalez A, Hooper DU, Perrings C, Venail P, et al. Biodiversity loss and its impact on humanity. *Nature* 2012; **486**: 59–67.
45. Schnyder E, Bodelier PLE, Hartmann M, Henneberger R, Niklaus PA. Positive diversity-functioning relationships in model communities of methanotrophic bacteria. *Ecology* 2018; **99**: 714–723.
46. Franklin RB, Garland JL a YL, Bolster CH, Mills AL, Mills L. Impact of dilution on microbial community structure and functional potential: Comparison of numerical simulations and batch culture experiments. *Appl Environ Microbiol* 2001; **67**: 702–712.
47. Philippot L, Spor A, Hénault C, Bru D, Bizouard F, Jones CM, et al. Loss in microbial diversity affects nitrogen cycling in soil. *ISME J* 2013; **7**: 1609–1619.
48. Cardinale BJ, Wright JP, Cadotte MW, Carroll IT, Hector A, Srivastava DS, et al. Impacts of plant diversity on biomass production increase through time because of species complementarity. *PNAS* 2007; **104**: 18123–18128.
49. Marquard E, Weigelt A, Temperton VM, Roscher C, Schumacher J, Buchmann N, et al. Plant species richness and functional composition drive overyielding in a six-year grassland experiment. *Ecology* 2009; **90**: 3290–3302.
50. Reich PB, Tilman D, Isbell F, Mueller K, Hobbie SE, Flynn DFB, et al. Impacts of biodiversity loss escalate through time as redundancy fades.

- Science* (80- ) 2012; **336**: 589–592.
51. van Moorsel SJ, Hahl T, Wagg C, De Deyn GB, Flynn DFB, Yadav V, et al. Community selection increases biodiversity effects. *bioRxiv* 2017.
  52. Huang Y, Chen Y, Castro-Izaguirre N, Baruffol M, Brezzi M, Lang A, et al. Impacts of species richness on productivity in a large-scale subtropical forest experiment. *Science* (80- ) 2018; **362**: 80–83.
  53. Dunfield PF. The soil methane sink. In: Reay DS, Hewitt CN, Smith KA, Grace J (eds). *Greenhouse Gas Sinks*. 2007. CABI publishing, Oxon, UK, pp 152–170.
  54. Fiegna F, Moreno-Letelier A, Bell T, Barraclough TG. Evolution of species interactions determines microbial community productivity in new environments. *ISME J* 2015; **9**: 1235–1245.
  55. Gravel D, Bell T, Barbera C, Bouvier T, Pommier T, Venail P, et al. Experimental niche evolution alters the strength of the diversity–productivity relationship. *Nature* 2011; **469**: 89–92.
  56. Lawrence D, Fiegna F, Behrends V, Bundy JG, Phillimore AB, Bell T, et al. Species interactions alter evolutionary responses to a novel environment. *PLoS Biol* 2012; **10**: e1001330–e1001330.
  57. Zuppinger-Dingley D, Schmid B, Petermann JS, Yadav V, De Deyn GB, Flynn DFB. Selection for niche differentiation in plant communities increases biodiversity effects. *Nature* 2014; **515**: 108–111.
  58. Collet S, Reim A, Ho A, Frenzel P. Recovery of paddy soil methanotrophs from long term drought. *Soil Biol Biochem* 2015; **88**: 69–72.

59. Ho A, Brink E van den, Reim A, Krause S, Bodelier PLE. Recurrence and frequency of disturbance have cumulative effect on methanotrophic activity, abundance, and community structure. *Front Microbiol* 2016; **6**: 1493.
60. Ho A, Angel R, Veraart AJ, Daebeler A, Jia Z, Kim SY, et al. Biotic interactions in microbial communities as modulators of biogeochemical processes: Methanotrophy as a model system. *Front Microbiol* 2016; **7**: 1–11.
61. Allan E, Bossdorf O, Dormann CF, Prati D, Gossner MM, Tscharrntke T, et al. Interannual variation in land-use intensity enhances grassland multidiversity. *PNAS* 2014; **111**: 308–313.
62. Ho A, de Roy K, Thas O, De Neve J, Hoefman S, Vandamme P, et al. The more, the merrier: Heterotroph richness stimulates methanotrophic activity. *ISME J* 2014; **8**: 1945–1948.
63. Veraart AJ, Garbeva P, van Beersum F, Ho A, Hordijk CA, Meima-Franke M, et al. Living apart together—bacterial volatiles influence methanotrophic growth and activity. *ISME J* 2018; **12**: 1163–1166.
64. Gómez KE, Gonzalez-Gil G, Lazzaro A, Schroth MH. Quantifying methane oxidation in a landfill-cover soil by gas push-pull tests. *Waste Manag* 2009; **29**: 2518–2526.
65. Henneberger R, Chiri E, Bodelier PLE, Frenzel P, Lüke C, Schroth MH. Field-scale tracking of active methane-oxidizing communities in a landfill cover soil reveals spatial and seasonal variability. *Environ Microbiol* 2015; **17**: 1721–1737.
66. Dedysch SN, Panikov NS, Tiedje JM. Acidophilic methanotrophic

- communities from *Sphagnum* peat bogs. *Appl Environ Microbiol* 1998; **64**: 922–929.
67. Niklaus PA, Alpehi J, Ebersberger D, Kandeler D, Kampichler C, Tscherko D. Six years of in situ CO<sub>2</sub> enrichment evoke changes in soil structure and soil biota of nutrient-poor grassland. *Glob Chang Biol* 2003; **9**: 585–600.
68. Ruijter JM, Ruiz Villalba A, Hellemans J, Untergasser A, van den Hoff MJB. Removal of between-run variation in a multi-plate qPCR experiment. *Biomol Detect Quantif* 2015; **5**: 10–14.
69. Edgar RC. Search and clustering orders of magnitude faster than BLAST. *Bioinformatics* 2010; **26**: 2460–2461.
70. Schloss PD. Introducing mothur: Open-source, platform-independent, community-supported software for describing and comparing microbial communities. *Appl Environ Microbiol* 2009; **75**: 7537–7541.
71. Pruesse E, Quast C, Knittel K, Fuchs BM, Ludwig W, Peplies J, et al. SILVA: A comprehensive online resource for quality checked and aligned ribosomal RNA sequence data compatible with ARB. *Nucleic Acids Res* 2007; **35**: 7188–7196.
72. Dumont MG, Lüke C, Deng Y, Frenzel P. Classification of *pmoA* amplicon pyrosequences using BLAST and the lowest common ancestor method in MEGAN. *Front Microbiol* 2014; **5**: 1–11.
73. Sievers F, Wilm A, Dineen D, Gibson TJ, Karplus K, Li W, et al. Fast, scalable generation of high-quality protein multiple sequence alignments using Clustal Omega. *Mol Syst Biol* 2011; **7**: 539.
74. McWilliam H, Li W, Uludag M, Squizzato S, Park YM, Buso N, et al.



- Analysis tool web services from the EMBL-EBI. *Nucleic Acids Res* 2013; **41**: W597-600.
75. Lüke C, Frenzel P. Potential of *pmoA* amplicon pyrosequencing for methanotroph diversity studies. *Appl Environ Microbiol* 2011; **77**: 6305–6309.
76. Becker J, Eisenhauer N, Scheu S, Jousset A. Increasing antagonistic interactions cause bacterial communities to collapse at high diversity. *Ecol Lett* 2012; **15**: 468–474.
77. Schmid B, Baruffol M, Wang Z, Niklaus PA. A guide to analyzing biodiversity experiments. *J Plant Ecol* 2017; **10**: 91–110.
78. Anderson MJ. A new method for non-parametric multivariate analysis of variance. *Austral Ecol* 2001; **26**: 32–46.
79. Benjamini Y, Hochberg Y. Controlling the false discovery rate - a practical and powerful approach to multiple testing. *J R Stat Soc Ser B - Stat Methodol* 1995; **57**: 289–300.

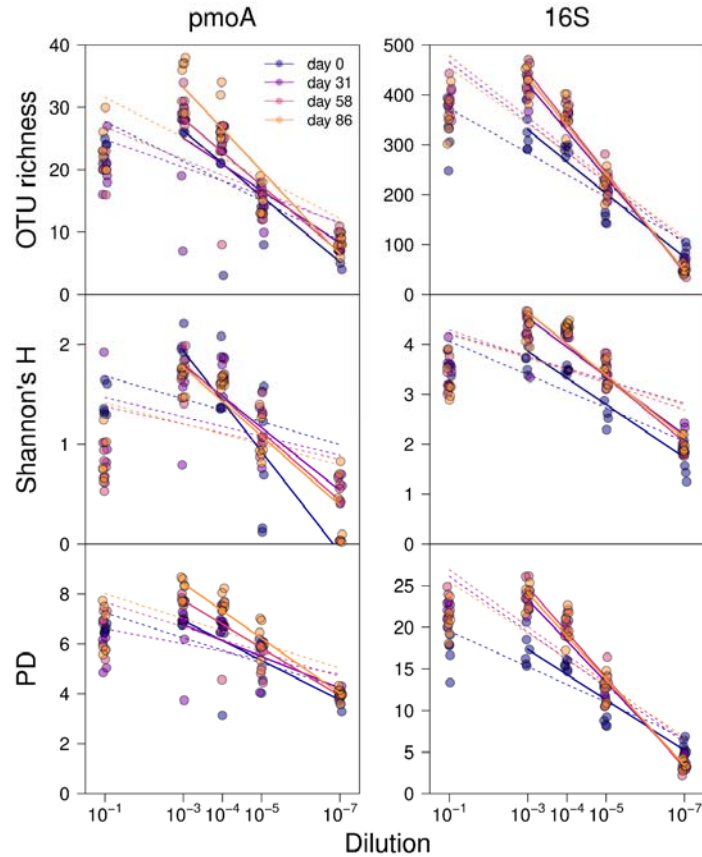

## Figures

**Figure 1 | Effects of dilution on OTU richness, Shannon diversity (H), and phylogenetic diversity (PD) in dependence of dilution level and sampling date.** Diversity metrics are based on rarefied sequence sets. Open symbols indicate samples for which no rarefaction was possible because sequence numbers were too low; these samples were not included in the computation of regression lines. DNA extraction was incomplete in the least diluted samples ( $10^{-1}$

1) where a precipitate formed. Linear regressions therefore are provided excluding (solid lines) and including (dashed lines) the  $10^{-1}$  dilution.

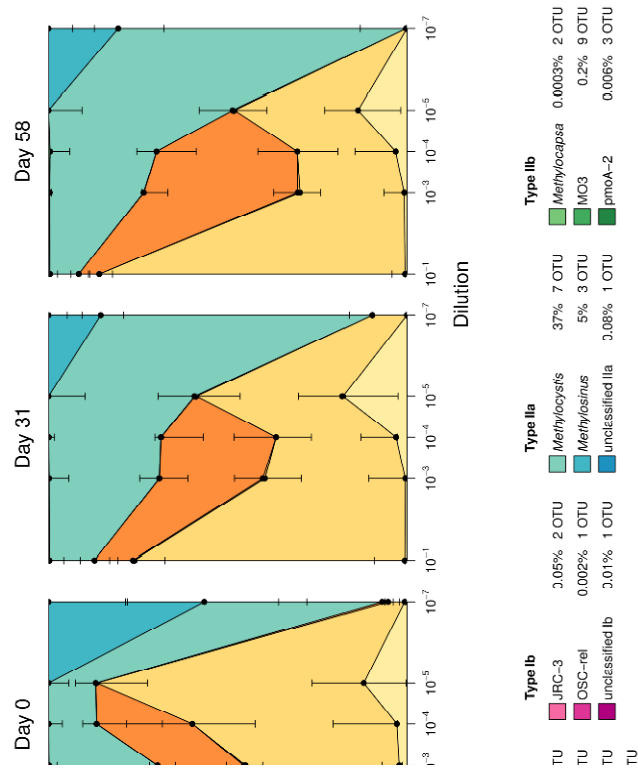

**Figure 2 | Effects of dilution on methanotroph community composition**

**through time.** The legend shows the average fractional abundance of all taxa across all sampling dates and dilution levels, together with the number of OTUs. Error bars show uncertainties for the different groups (1 s.e.) and are directed inwards.

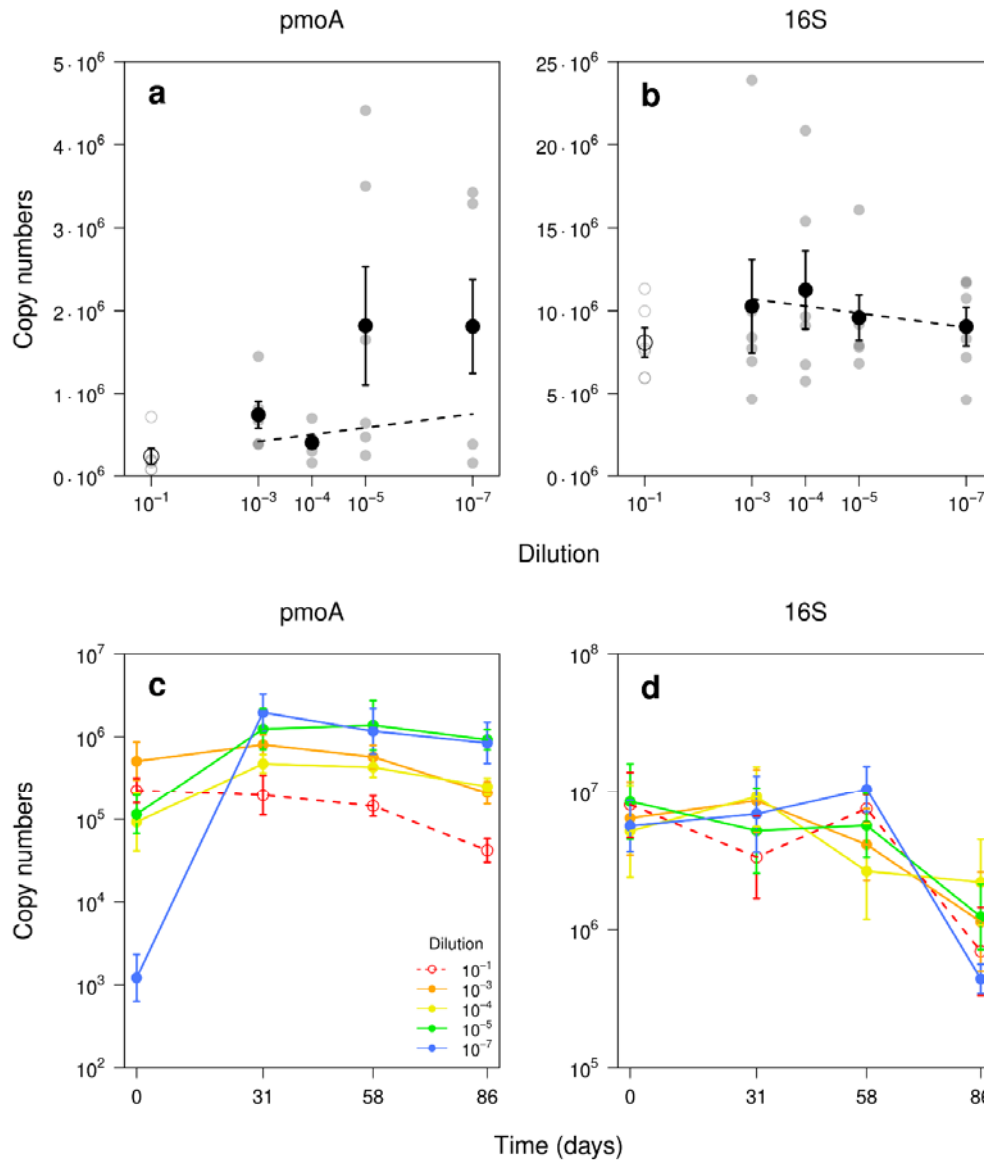

**Figure 3 | Bacterial and methanotroph community size, determined as (a,c) *pmoA* and (b,d) 16S rRNA gene copy numbers.** (a,b) Gene copy numbers in dependence of applied dilution treatment. Grey symbols indicate averages across 4 sampling dates for each community composition  $\times$  temperature treatment combination (3 dilution series  $\times$  5 dilution levels  $\times$  2 temperatures). Dashed lines show linear regressions accounting for heterogeneous variance among dilution levels. Note that the copy numbers are shown on a linear scale, yielding horizontal regression lines under the null hypothesis (see methods). Black

symbols indicate mean copy numbers for each dilution level, with error bars indicating standard errors (n=6). (c,d) Gene copy numbers in dependence of sampling date and dilution (mean  $\pm$  s.e.; n=6). Data are shown on a logarithmic scale, which accounts for the exponential error distribution introduced by the PCR process but is not suited to test for effects of diversity reductions by dilution (see methods).

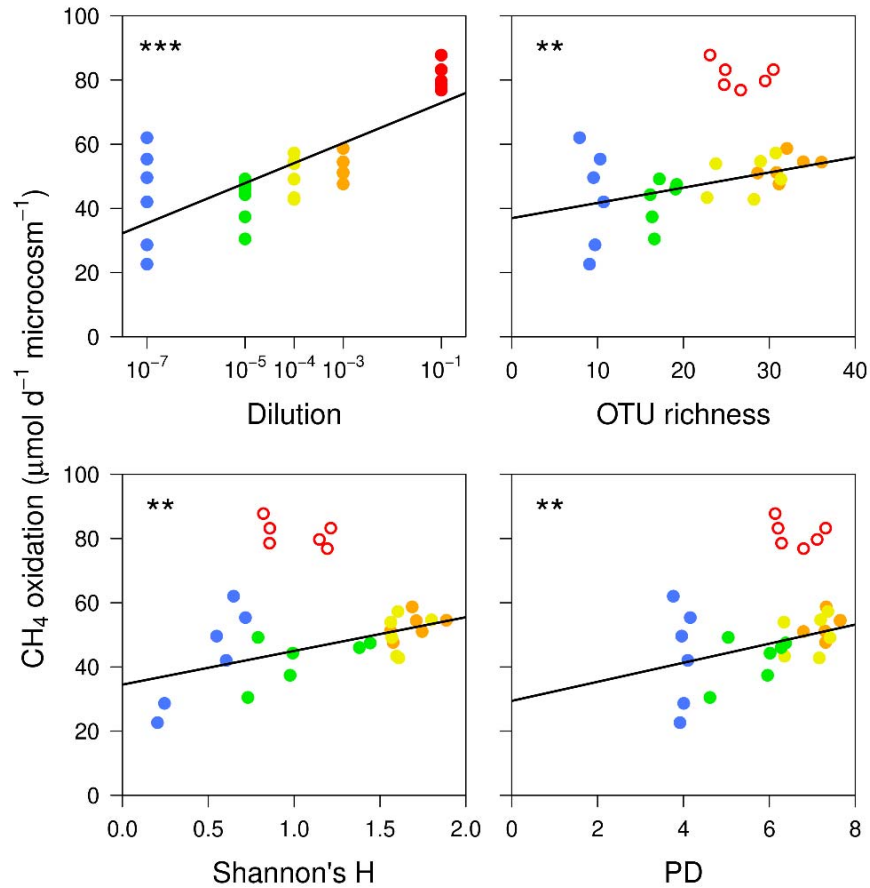

**Figure 4 | Net CH<sub>4</sub> consumption rates of microcosms in dependence of dilution level and methanotrophic diversity [*pmoA*-based OTU richness, Shannon index (H), and phylogenetic diversity (PD)]. Symbols show means for each microcosm (n=3 replicates × 2 temperature treatments per dilution level; temperature: n.s.). Samples with 10<sup>-1</sup> dilution are excluded from statistical tests (indicated by open symbols) because of incomplete DNA extraction due to precipitate. \*\*\* P<0.001; \*\* P<0.01; \* P<0.05.**

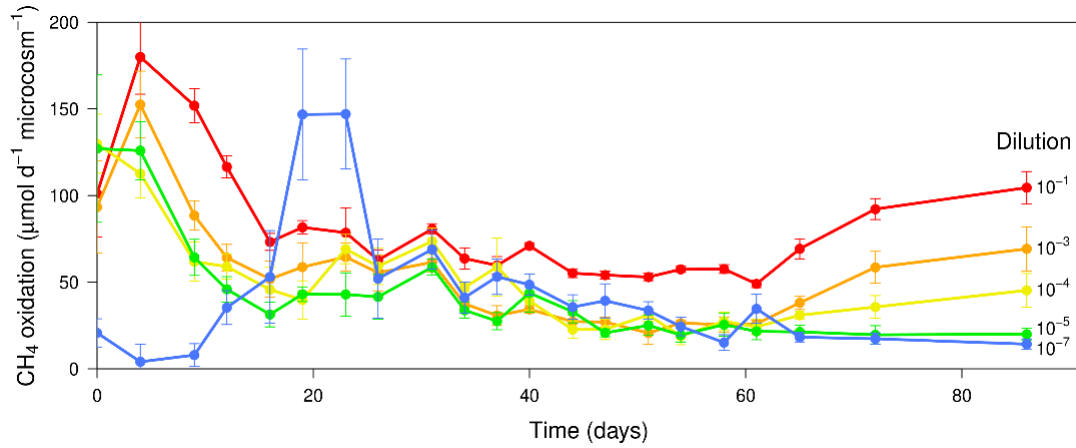

**Figure 5 | Net headspace CH<sub>4</sub> consumption rates of microcosms as a function of dilution level and sampling date.** Data of the two temperature treatments were combined because no temperature effect was detected. Symbols show mean  $\pm$  se (n=6).
